# Supplementary material for: The CML experience to elucidate the role of innate T-cells as effectors in the control of residual cancer cells and as potential targets for cancer therapy
Source: PubMed Central journal article supplement (PMC11604645; doi:10.3389/fimmu.2024.1473139), 2024-11-15
Supplement: DataSheet1.pdf [file DataSheet1.pdf]

**Table: Patient Characteristics**

| Nº | Sex | Age at D0 | Treatment                         | Treatment Duration (months) | Molecular response (log) | MR (months) | Cohort |
|----|-----|-----------|-----------------------------------|-----------------------------|--------------------------|-------------|--------|
| 1  | F   | 68        | Ima                               | 43                          | 5                        | 4           | MR     |
| 2  | M   | 80        | IFN $\alpha$ -Ima                 | 145                         | 4,5                      | 5           | MR     |
| 3  | F   | 38        | Hydrea-Ima                        | 57                          | 5                        | 5           | MR     |
| 4  | F   | 55        | Dasa                              | 95                          | 5                        | 3           | MR     |
| 5  | M   | 43        | Dasa                              | 103                         | 4,5                      | 2           | MR     |
| 6  | M   | 43        | Ima                               | 62                          | 4,5                      | 6           | MR     |
| 7  | M   | 61        | IFN $\alpha$ -Dasa                | 62                          | 5                        | 3           | MR     |
| 8  | F   | 37        | Hydrea-Dasa                       | 69                          | 5                        | 0           | MR     |
| 9  | F   | 29        | Hydrea-Ima-<br>IFN $\alpha$ -Dasa | 168                         | 4,5                      | NA          | TFR    |
| 10 | F   | 73        | Hydrea-Actos-<br>Ima              | 136                         | 4,5                      | NA          | TFR    |
| 11 | M   | 82        | Dasa                              | 63                          | 5                        | NA          | TFR    |
| 12 | M   | 57        | Ima - Nilo                        | >82                         | 4                        | NA          | TFR    |
| 13 | M   | 81        | IFN $\alpha$ -Ima-Dasa            | >217                        | 4,5                      | NA          | TFR    |
| 14 | M   | 78        | Dasa                              | 102                         | 5                        | NA          | TFR    |
| 15 | M   | 68        | Ima - Nilo                        | 122                         | 5                        | NA          | TFR    |
| 16 | M   | 62        | IFN $\alpha$ -Actos-Ima           | >220                        | 4                        | NA          | TFR    |
| 17 | M   | 59        | Aracytine-Ima-<br>Nilo-Dasa       | 166                         | 5                        | NA          | TFR    |
| 18 | M   | 26        | Ima                               | 111                         | 4,5                      | NA          | TFR    |
| 19 | M   | 54        | IFN $\alpha$ -Ima                 | 55                          | 4,5                      | NA          | TFR    |
| 20 | M   | 65        | Ima                               | 183                         | 5                        | NA          | TFR    |
| 21 | F   | 70        | Nilo                              | 83                          | 4,5                      | NA          | TFR    |
| 22 | F   | 64        | Ima - Dasa                        | 191                         | 4,5                      | NA          | TFR    |
| 23 | F   | 72        | Ima                               | 164                         | 5                        | NA          | TFR    |
| 24 | F   | 53        | Dasa                              | 71                          | 4,5                      | NA          | TFR    |
| 25 | F   | 53        | Dasa                              | 100                         | 4                        | NA          | TFR    |
| 26 | M   | 66        | Dasa                              | 34                          | 5                        | NA          | TFR    |
| 27 | M   | 40        | Dasa                              | >54                         | 5                        | NA          | TFR    |
| 28 | M   | 53        | Dasa - Bosu                       | >64                         | 5                        | NA          | TFR    |
| 29 | F   | 64        | Dasa                              | 72                          | 5                        | NA          | TFR    |
| 30 | F   | 57        | Dasa                              | 44                          | 5                        | NA          | TFR    |
| 31 | F   | 80        | Dasa                              | 76                          | 5                        | NA          | TFR    |
| 32 | F   | 60        | Dasa                              | 75                          | 5                        | NA          | TFR    |

NA: not applicable

Ima: imatinib ; Dasa: dasatinib ; Nilo: nilotinib ; Bosu: bosutinib

MMR: major molecular remission

D0: treatment discontinuation

MR: molecular recurrence

TFR: treatment-free remission

## Supplementary Figure 1

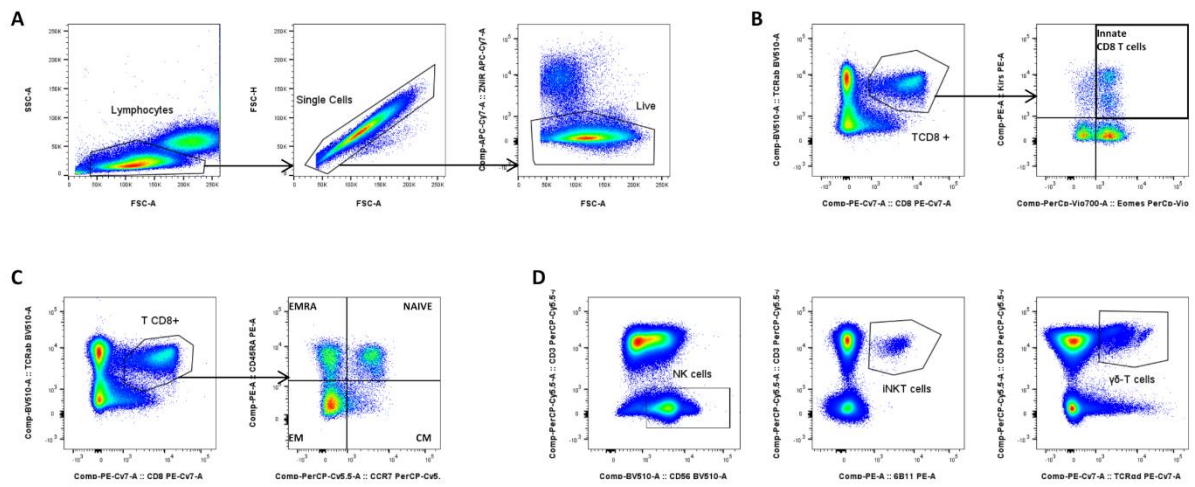

**Gating strategies for the identification of innate and conventional T-cells, NK cells, iNKT cells and  $\gamma\delta$  T-cells. (A)** Common gating tree to define live lymphocytes. **(B)** Gating tree for innate CD8 T-cells defined as TCR- $\alpha\beta$ (+)CD8(+)KIR/NKG2A(+)Eomes (+) cells. **(C)** Gating tree for memory phenotype of CD8 T-cells defined as TCR- $\alpha\beta$ (+)CD8(+) cells, and based on the expression of CD45RA and/or CCR7. **(D)** NK cells, iNKT cells and  $\gamma\delta$  T-cells are defined as CD3(-)CD56(+) cells, CD3(+)TCR-V $\alpha$ 24-J $\alpha$ 18(+) cells, and CD3(+)TCRpan- $\gamma\delta$ (+) cells, respectively.

## Supplementary Figure 2

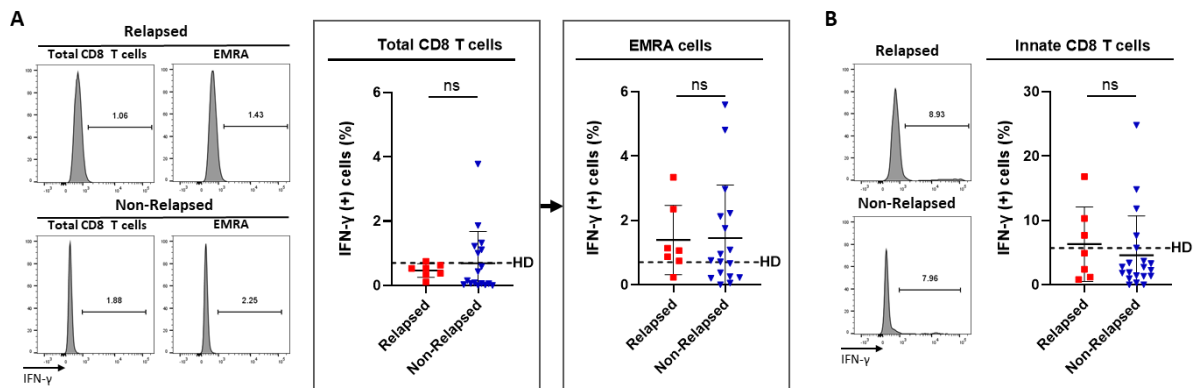

**Frequencies of IFN- $\gamma$ -expressing cells among circulating CD8 T-cell subtypes after innate stimulation: comparison between relapsed and non-relapsed patients at the moment of TKI discontinuation.** PBMC were cultured with IL-12+IL-18 for 48 h. **(A)** Frequency of IFN- $\gamma$ -expressing cells after gating on total CD8 T-cells and EMRA cells, defined as TCR- $\alpha\beta$ (+)CD8(+) cells and TCR- $\alpha\beta$ (+)CD8(+)CCR7(-)CD45RA(+), respectively, from relapsed (n=7) and non-relapsed (n=17) patients. HD means (dotted lines): 0.7%  $\pm$  0.76% of total CD8 T cells; 0.7%  $\pm$  0.46% of EMRA cells (n=13). **(B)** Frequency of IFN- $\gamma$ -expressing cells after gating on innate CD8 T-cells, defined as TCR- $\alpha\beta$ (+)CD8(+)Eomes(+)KIR/NKG2A(+) cells, from relapsed (n=7) and non-relapsed (n=20) patients. HD mean (dotted line): 5.7%  $\pm$  4.9% (n=13). Representative flow cytometry histograms represent expression of IFN- $\gamma$  in the different cell populations of interest in relapsed (top left) and non-relapsed (bottom left) patients. Numbers in flow cytometry histograms indicate the frequencies of IFN- $\gamma$ -expressing cells in the indicated cell population. Histograms represent cohort analysis of frequencies of cells expressing IFN- $\gamma$  (mean  $\pm$  SD). Each dot represents a relapsed (red squares) or a non-relapsed (blue triangles) patient. Statistical significance was determined by the two-tailed Mann-Whitney non-parametric test. ns: not significant.

### Supplementary Figure 3

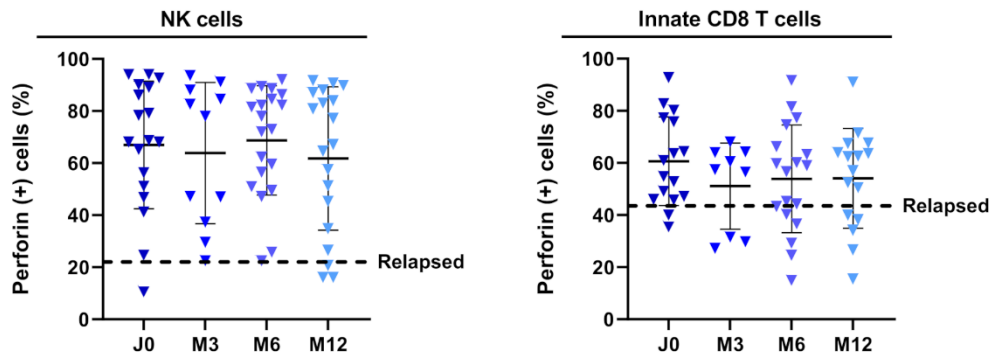

**Comparison of frequencies of perforin-expressing NK cell and innate CD8 T-cells between relapsed and non-relapsed patients: longitudinal analysis after treatment discontinuation.** Frequencies of perforin-expressing NK cells (left panel) and innate CD8 T-cells (right panel), defined as CD3(-)CD56(+) cells and TCR- $\alpha\beta$ (+)CD8(+)Eomes(+)KIR/NKG2A(+) cells, respectively, from non-relapsed patients at the moment of TKI discontinuation (n=18), and 3 months (n=11), 6 months (n=20) and 12 months (n=19) after TKI discontinuation. Relapsed patient means at the moment of TKI cessation (dotted lines): 22%  $\pm$  7.1% of NK cells, 43.5%  $\pm$  9.1% of innate CD8 T cells (n=4). Of note, values of non-relapsed patients remained higher after 3, 6 and 12 months (p-values for NK cells: 0.0264, 0.0048, 0.0645, respectively; p-values for innate CD8 T-cells: 0.2523, 0.1409, 0.1353, respectively) after TKI cessation, when compared with relapsed patients at the moment of TKI cessation. Histograms represent kinetics cohort analysis of frequencies of cells expressing perforin (mean  $\pm$  SD). Each dot represents a non-relapsed patient at the moment of TKI discontinuation, and 3 months, 6 months or 12 months after TKI discontinuation

### Supplementary Figure 4

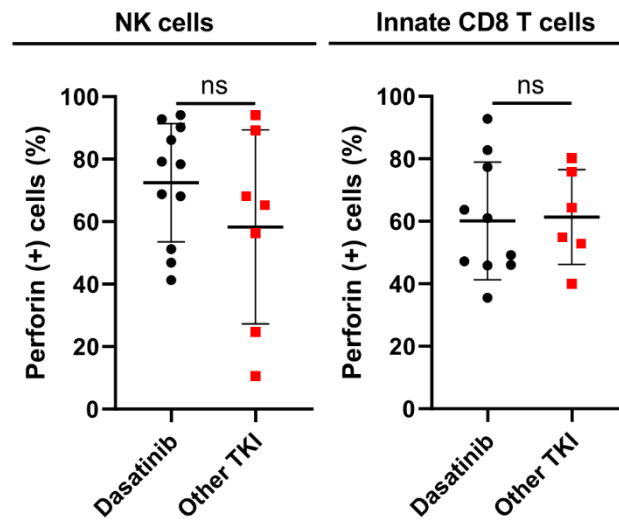

**Frequencies of perforin-expressing NK and innate CD8 T-cells from non-relapsed patients: comparison between dasatinib- and other TKI- treated patients.** Frequencies of perforin-expressing NK cells (left panel) and innate CD8 T-cells (right panel), defined as CD3(-)CD56(+) cells and TCR- $\alpha\beta$ (+)CD8(+)Eomes(+)KIR/NKG2A(+) cells, respectively, from non-relapsed patients treated with dasatinib (n=10) or with other TKI (n=6). Histograms represent cohort analysis of frequencies of cells expressing perforin (mean  $\pm$  SD) among the indicated cell population. Each dot represents a non-relapsed patient treated with dasatinib (black dots) or a non-relapsed patient treated with other TKI than dasatinib (red squares) at the moment of TKI cessation. Statistical significance was determined by the two-tailed Mann-Whitney non-parametric test. P- value: ns: not significant.

### Supplementary Figure 5

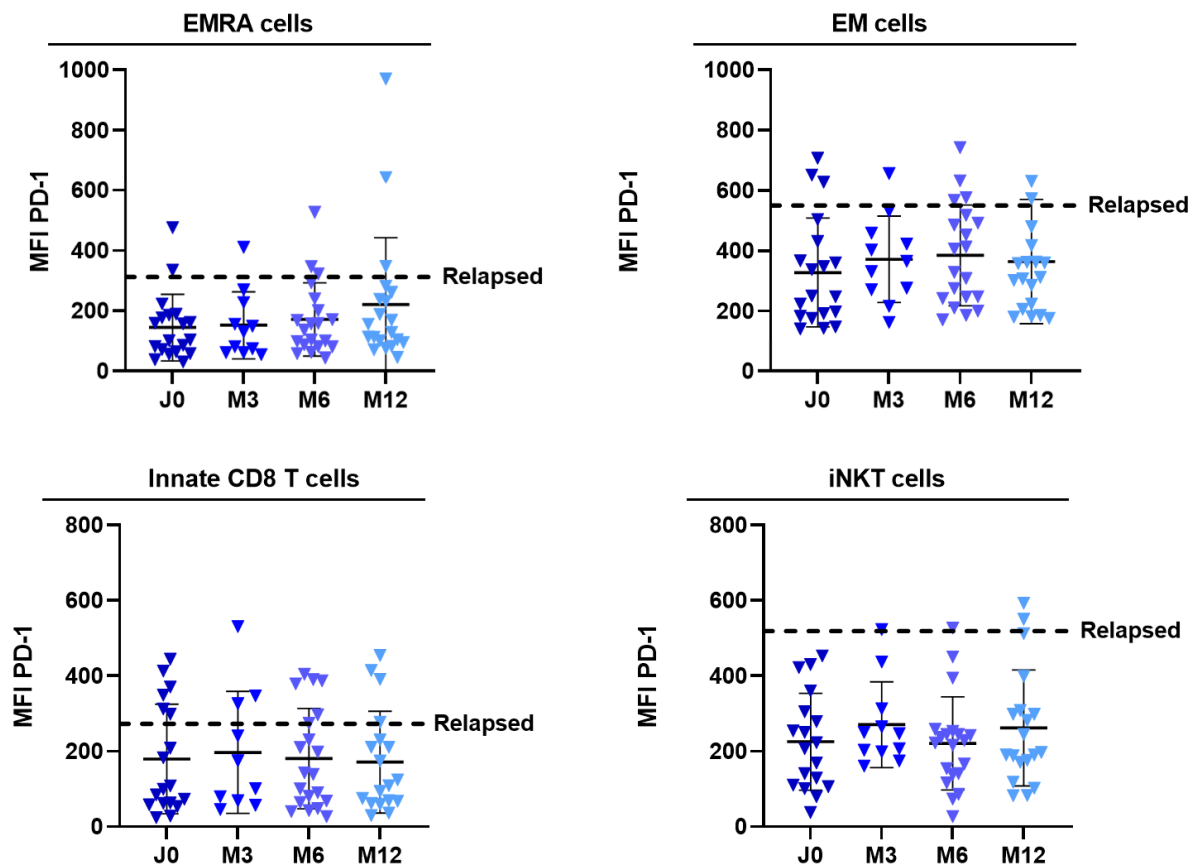

**Comparison of frequencies of PD-1 MFI on effector T-cell subsets between relapsed and non-relapsed patients: longitudinal analysis after treatment discontinuation.** PD-1 MFI on EMRA cells (upper left panel), defined as TCR- $\alpha\beta$ (+)CD8(+)CCR7(-)CD45RA(+), EM cells, (upper right panel) defined as TCR- $\alpha\beta$ (+)CD8(+)CCR7(-)CD45RA(-) cells, innate CD8 T-cells (lower left panel), defined as TCR- $\alpha\beta$ (+)CD8(+)Eomes(+)KIR/NKG2A(+) cells, and iNKT cells, (lower right panel) defined as CD3(+)TCR-V $\alpha$ 24-J $\alpha$ 18(+) cells, from non-relapsed patients at the moment of TKI discontinuation (n=18), and 3 months (n= 11), 6 months (n=20) and 12 months (n=19) after TKI discontinuation. Relapsed patient means at the moment of TKI cessation (dotted lines):  $313 \pm 143$ ,  $550 \pm 153.3$ ,  $219 \pm 75$  and  $273 \pm 189.6$  for EMRA cells, EM cells, iNKT cells, and innate CD8-T cells, respectively (n=5). Of note, values of non-relapsed patients remained lower 3, 6 and 12 months after TKI discontinuation for EM cells (p-values: 0.0346, 0.0549, 0.0056, respectively), EMRA cells (p-values: 0.0346, 0.0263, 0.0716, respectively), and iNKT cells (p-values: 0.0094, 0.0011, 0.0144), and 6 and 12 months after discontinuation for innate CD8-T cells (p-values: 0.0813, 0.0392, respectively), when compared with relapsed patients at the moment of TKI cessation.

Histograms represent kinetics cohort analysis of PD-1 MFI (mean  $\pm$  SD). Each dot represents a non-relapsed patient at the moment of TKI discontinuation, and 3 months, 6 months or 12 months after TKI discontinuation.

**Supplementary Figure 6**

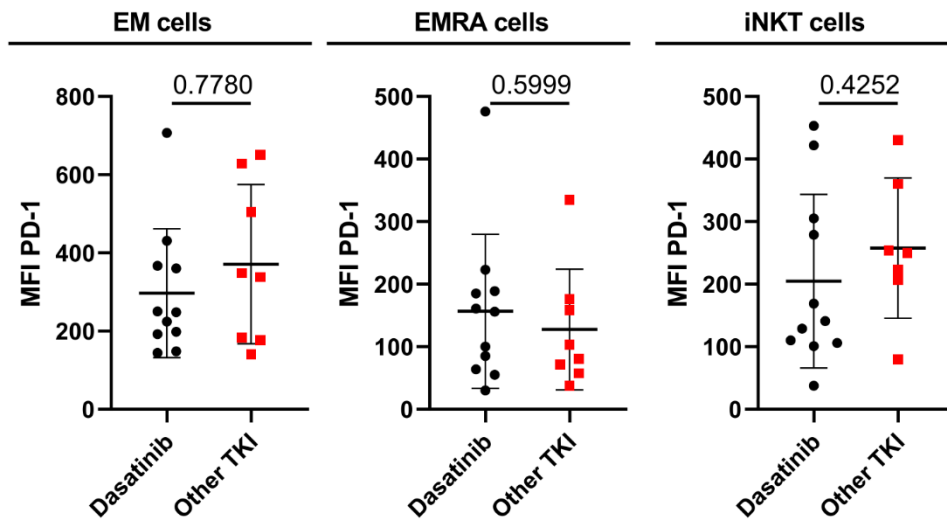

**Frequencies of PD-1 MFI on effector T-cell subsets from non-relapsed patients: comparison between dasatinib- and other TKI- treated patients.** PD1 MFI on EMRA cells (left panel), defined as TCR- $\alpha\beta$ (+)CD8(+)CCR7(-)CD45RA(+), EM cells (medium panel), defined as TCR- $\alpha\beta$ (+)CD8(+)CCR7(-)CD45RA(-), and iNKT cells (right panel), defined as CD3(+)TCR-V $\alpha$ 24-J $\alpha$ 18(+), from non-relapsed patients treated with dasatinib (n=11) or with other TKI (n=7). Histograms represent cohort analysis of PD-1 MFI (mean  $\pm$  SD) among the indicated cell population. Each dot represents a non-relapsed patient treated with dasatinib (black dots) or a non-relapsed patient treated with other TKI than dasatinib (red squares) at the moment of TKI cessation. Statistical significance was determined by the two-tailed Mann-Whitney non-parametric test. P-value: ns: not significant.
